# Supplementary material for: Genetic deletion of microsomal prostaglandin E synthase-1 promotes imiquimod-induced psoriasis in mice
Source: Springer Nature journal article supplement (doi:10.1186/s41232-025-00385-2), 2025-06-06
Supplement: MOESM1 [file 41232_2025_385_MOESM1_ESM.pdf]

# Figure S1

A

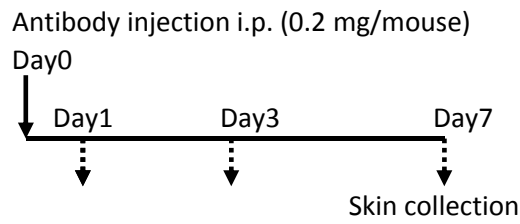

B

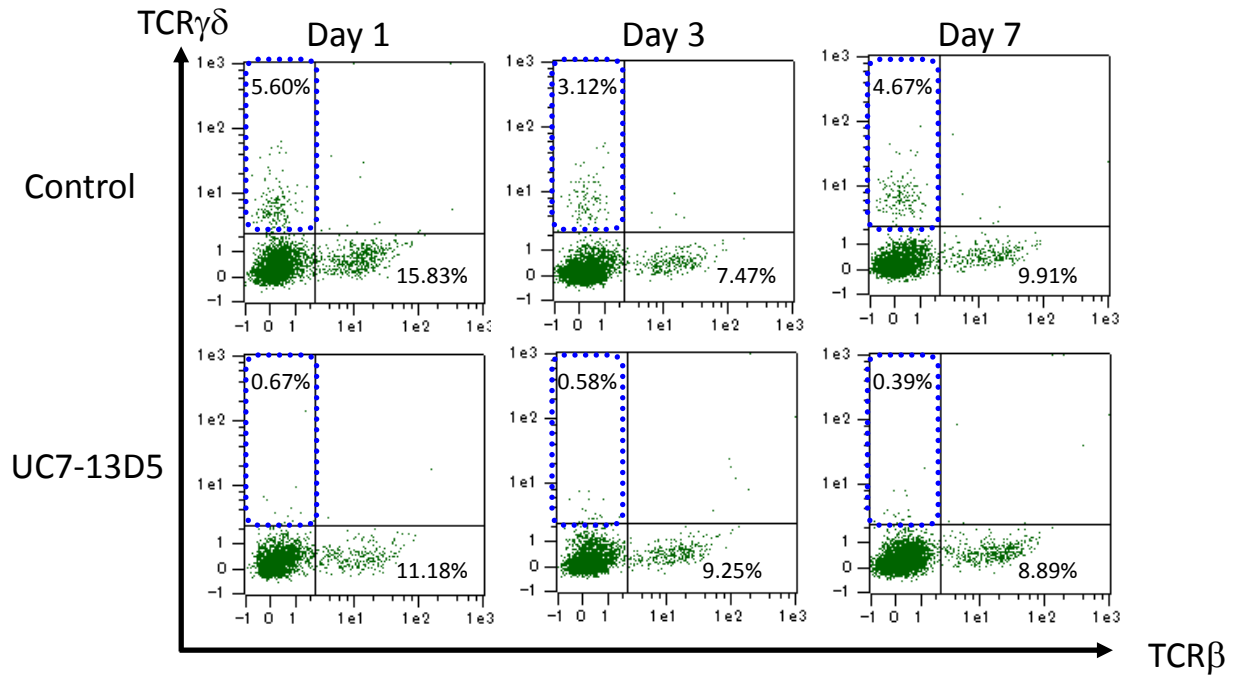

**Figure S1. In vivo depletion of  $\gamma\delta$  T cells by anti-TCR $\gamma\delta$  (clone UC7-13D5 polyclonal antibody).** (A) Schematic representation of the experimental plan. Solid arrows indicate timepoint (days) at which the intraperitoneal injection of the antibody were performed. (B) The efficacy of  $\gamma\delta$  T-cell depletion was confirmed through an FCM analysis of the skin samples. The administration of anti-TCR $\gamma\delta$  antibody was successful in maintaining a significant decrease in the TCR $\gamma\delta$ -positive  $\gamma\delta$  T cells but not TCR $\beta$ -positive  $\alpha\beta$  T cells for 7 days after the antibody administration.

Figure S2

A

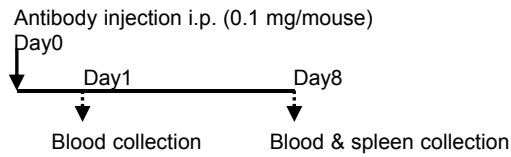

B

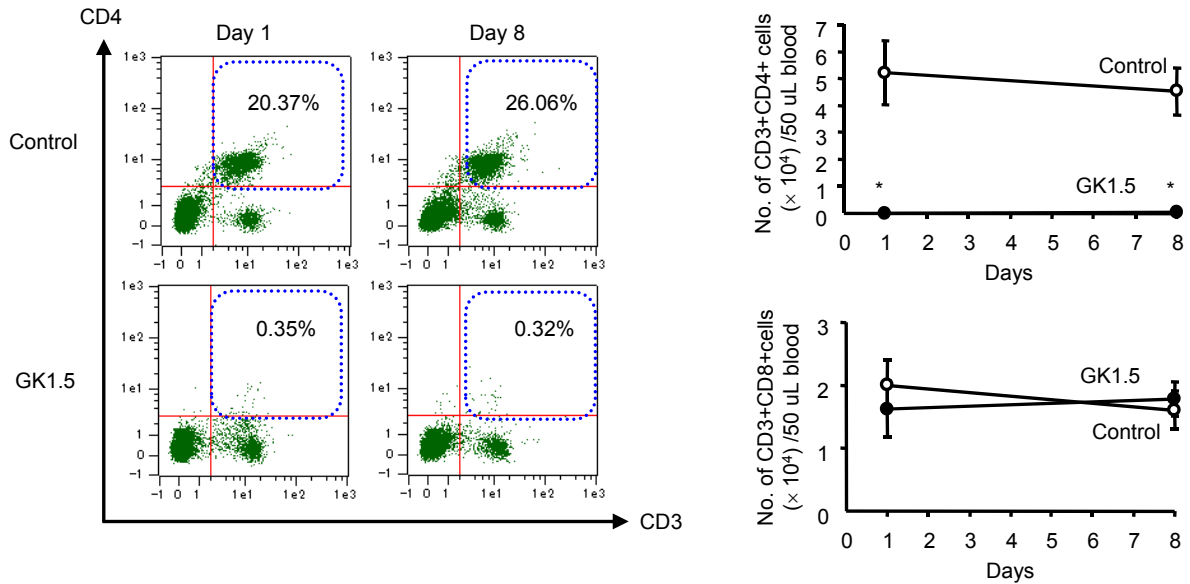

C

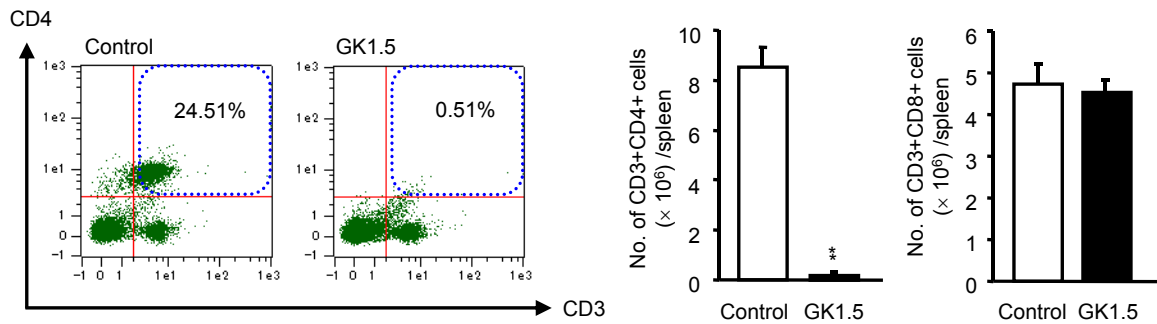

**Figure S2. In vivo depletion of CD4-positive T cells by anti-CD4 (clone GK1.5) monoclonal antibody.** (A) Schematic representation of the experimental plan (A). Solid arrows indicate time-point (days) at which intraperitoneal injection of the antibody were performed. The efficacy of CD4-positive T cell depletion was confirmed by FCM analysis of T cell population in the peripheral blood (B) and spleen (C). FCM analysis confirmed that anti-CD4 antibody treatment effectively reduced the number of CD3+CD4+ T cells but not CD3+CD8+ T cells in the peripheral blood and spleen of the treated mice compared to the control mice. \* $P < 0.05$  vs. control;  $t$  test ( $n=4$ )

Figure S3

A

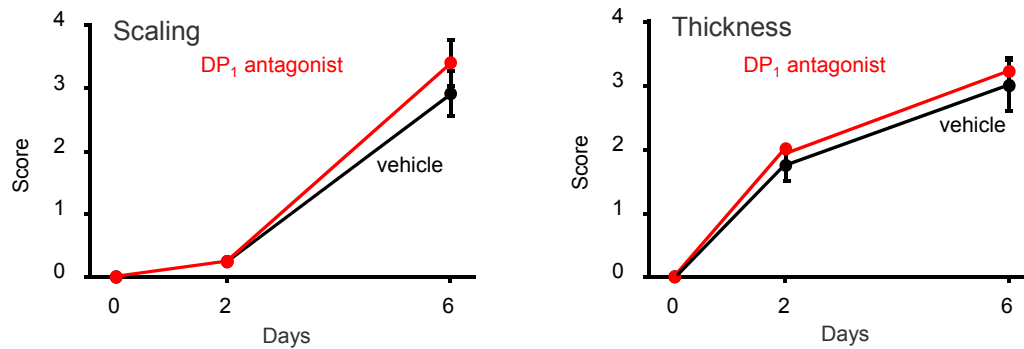

B

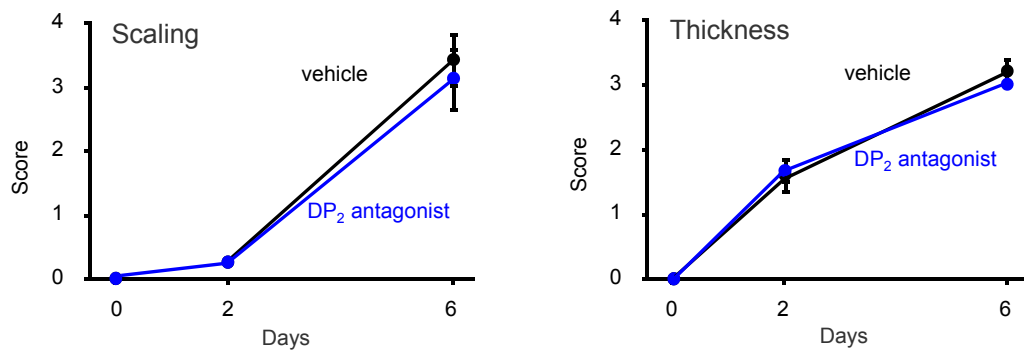

**Figure S3. Effect of pharmacological DP receptor inhibition on facilitated psoriasis under the condition of mPGES-1 deficiency.** Given that PGD<sub>2</sub> production was increased in the skin of mPGES-1<sup>-/-</sup> mice after the induction of psoriasis, we investigated the effects of PGD<sub>2</sub> in the IMQ-induced psoriasis pathology under the condition of mPGES-1 deficiency using antagonists specific for each DP subtype DP<sub>1</sub> and DP<sub>2</sub>. (A) DP<sub>1</sub> antagonist BWA868C (Cayman) was administered intraperitoneally to the mPGES-1<sup>-/-</sup> mice at a dose of 1 mg/kg daily for 6 days immediately before the IMQ treatment, and the psoriasis pathology was evaluated. There was no significant difference in the skin scaling and thickening scores between mPGES-1<sup>-/-</sup> mice treated with a DP<sub>1</sub> antagonist and mPGES-1<sup>-/-</sup> mice treated with a vehicle (n=6–9). (B) The DP<sub>2</sub> antagonist CAY10471 (Cayman) was administered intraperitoneally to the mPGES-1<sup>-/-</sup> mice at a dose of 2 mg/kg daily for 6 days immediately before the IMQ treatment. Similarly, there was no significant difference in both scores between the DP<sub>2</sub> antagonist and vehicle control in mPGES-1<sup>-/-</sup> mice (n=8–9). These results suggest that PGD<sub>2</sub>, which is increased in the skin of psoriasis-induced mPGES-1<sup>-/-</sup> mice, is unlikely to exacerbate or alleviate the major symptoms of IMQ-induced psoriasis. \**P* < 0.05 ; ANOVA followed by Tukey's multiple comparison test.
